# Supplementary material for: A 2D/2D/2D Ti3C2Tx@TiO2@MoS2 heterostructure as an ultrafast and high-sensitivity NO2 gas sensor at room-temperature
Source: Royal Society of Chemistry journal article supplement (doi:10.1039/d1ta09369j), 2021-12-15
Supplement: d1ta09369j1.pdf [file d1ta09369j1.pdf]

## Electronic Supplementary Information

### **2D/2D/2D Ti<sub>3</sub>C<sub>2</sub>T<sub>x</sub>@TiO<sub>2</sub>@MoS<sub>2</sub> Heterostructure as Ultrafast and High-sensitivity NO<sub>2</sub> Gas Sensor at Room-temperature**

Zhuo Liu<sup>a</sup>, He Lv<sup>a</sup>, Ying Xie<sup>a</sup>, Jue Wang<sup>a</sup>, Jiahui Fan<sup>a</sup>, Baihe Sun<sup>a</sup>, Lin Jiang<sup>a</sup>, Yang Zhang<sup>a</sup>, Ruihong Wang<sup>\*a</sup> and Keying Shi<sup>\*a</sup>

*a. Key Laboratory of Functional Inorganic Material Chemistry, Ministry of Education, School of Chemistry and Material Science, Heilongjiang University, Harbin, 150080, P. R. China.*

\* Corresponding author

Corresponding author: Tel.: +86 451 86609141; +86 451 86604920

E-mail: wangruihong@hlju.edu.com

E-mail: shikeying2008@163.com

Fax: +86 4518667 3647; Tel: +86 451 8660 9141

**Table S1** NO<sub>2</sub> sensing performance of MoS<sub>2</sub>-based sensors.

| Materials                                                                       | W. T.<br>(°C)    | Gas            |                                    | Sensitivity<br>(R <sub>a</sub> /R <sub>g</sub> ) <sup>②</sup> | LOD<br>(ppm) | Ref              |
|---------------------------------------------------------------------------------|------------------|----------------|------------------------------------|---------------------------------------------------------------|--------------|------------------|
|                                                                                 |                  | Conc.<br>(ppm) | T <sub>res</sub> /T <sub>rec</sub> |                                                               |              |                  |
| <b>Ti<sub>3</sub>C<sub>2</sub>T<sub>x</sub>@TiO<sub>2</sub>@MoS<sub>2</sub></b> | <b>RT (25°C)</b> | <b>50</b>      | <b>1.8s/70.0s</b>                  | <b>55.12<sup>①</sup></b>                                      | <b>0.023</b> | <b>This Work</b> |
| p-Type MoS <sub>2</sub>                                                         | 125              | 100            | 14.33s/40.67s                      | 10.36% <sup>②</sup>                                           | 0.1          | [1]              |
| Monolayers-MoS <sub>2</sub> film<br>(visible light)                             | RT               | 0.2            | 83s/133s                           | --                                                            | 0.005        | [2]              |
| MoS <sub>2</sub> (UV light)                                                     | RT               | 50             | 50s/100s                           | --                                                            | 0.1          | [3]              |
| MoS <sub>2</sub> /rGO aerogel                                                   | 200              | 0.5            | --/ < 1min                         | 8.7% <sup>②</sup>                                             | 0.05         | [4]              |
| Few-layer MoS <sub>2</sub> film                                                 | 120              | 50             | --/--                              | 38% <sup>②</sup>                                              | --           | [5]              |
| MoS <sub>2</sub> -ZnO                                                           | RT               | 50             | 1.5s/30.9s                         | ~35 <sup>①</sup>                                              | 0.01         | [6]              |
| MoS <sub>2</sub> /C <sub>3</sub> N <sub>4</sub> Hybrid<br>Aerogel               | RT               | 50             | 2.1s/35.7s                         | 61.07 <sup>①</sup>                                            | 0.01         | [7]              |
| MoS <sub>2</sub> /ZnO                                                           | RT               | 10             | --/--                              | 40% <sup>②</sup>                                              | --           | [8]              |
| MoS <sub>2</sub> -rGO-Cu <sub>2</sub> O                                         | RT               | 1              | --/--                              | 3.06% <sup>②</sup>                                            | 0.08         | [9]              |
| 40% 1T- and 60% 2H-<br>MoS <sub>2</sub>                                         | RT               | 2              | 10s/--                             | 25% <sup>②</sup>                                              | 0.025        | [10]             |
| MoS <sub>2</sub> -SnO <sub>2</sub>                                              | RT               | 100            | 2.2s/225s                          | 34.67 <sup>①</sup>                                            | 0.5          | [11]             |
| MOF-derived<br>In <sub>2</sub> O <sub>3</sub> /MoS <sub>2</sub>                 | RT               | 20             | 152s/<179s                         | ~28 <sup>①</sup>                                              | 0.1          | [12]             |
| MoS <sub>2</sub> NSs/PbS QDs                                                    | RT               | 10             | 15s/62s                            | 6.15 <sup>①</sup>                                             | 1            | [13]             |

W.T.: Working temperature; LOD: limit of detection; RT: Room temperature.

①:  $S=R_a/R_g$

②:  $S=|R_a-R_g|/R_a \times 100\%$  or  $S=|R_g-R_a|/R_a \times 100\%$

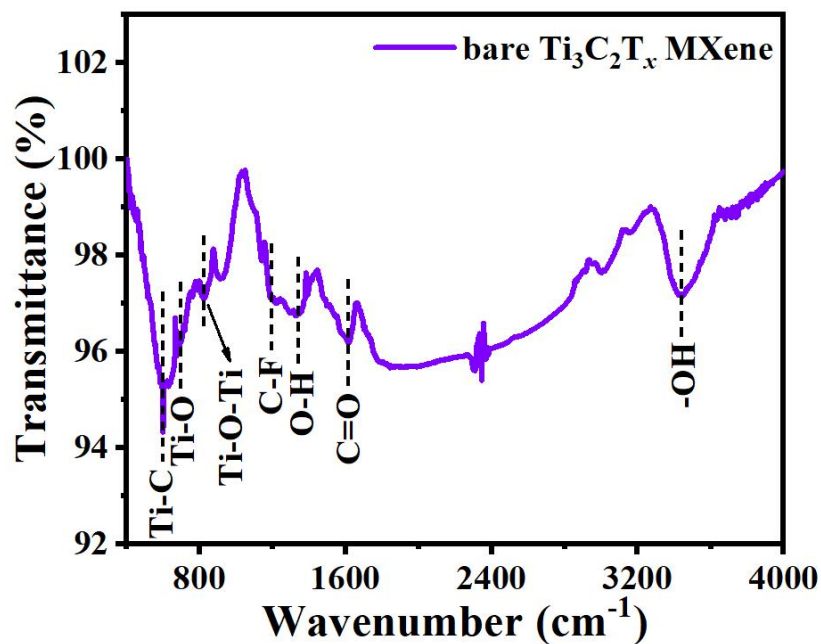

**Fig. S1** FT-IR image of bare  $\text{Ti}_3\text{C}_2\text{T}_x$  MXene nanosheets.

As shown in Fig. S1, FT-IR image revealed the stretching vibrations of the bare  $\text{Ti}_3\text{C}_2\text{T}_x$  MXene at around  $3441$  and  $1650\text{ cm}^{-1}$ , corresponding to the adsorbed water molecules (-OH) and C=O groups.<sup>14</sup> The peak at  $1327$  and at  $1223\text{ cm}^{-1}$  are assigned to the O-H and C-F,<sup>15</sup> and another two obvious peaks at  $601$ ,  $649$  and  $823\text{ cm}^{-1}$ , corresponding to the stretching vibration of Ti-C, Ti-O and Ti-O-Ti.<sup>16,17</sup>

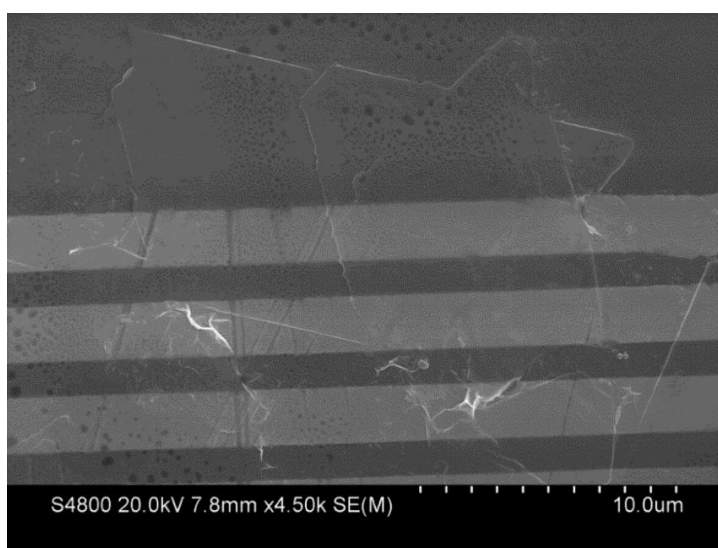

**Fig. S2** SEM image of bare  $\text{Ti}_3\text{C}_2\text{T}_x$  MXene nanosheets.

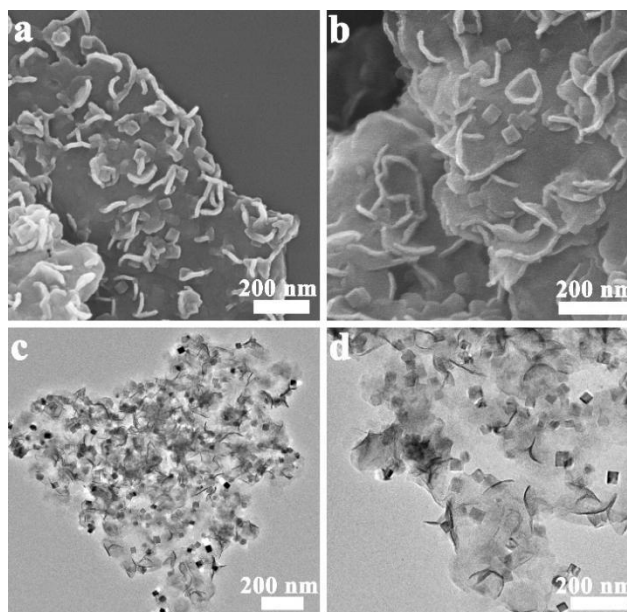

**Fig. S3** SEM images of  $\text{Ti}_3\text{C}_2\text{T}_x@\text{TiO}_2@\text{MoS}_2$  composite.

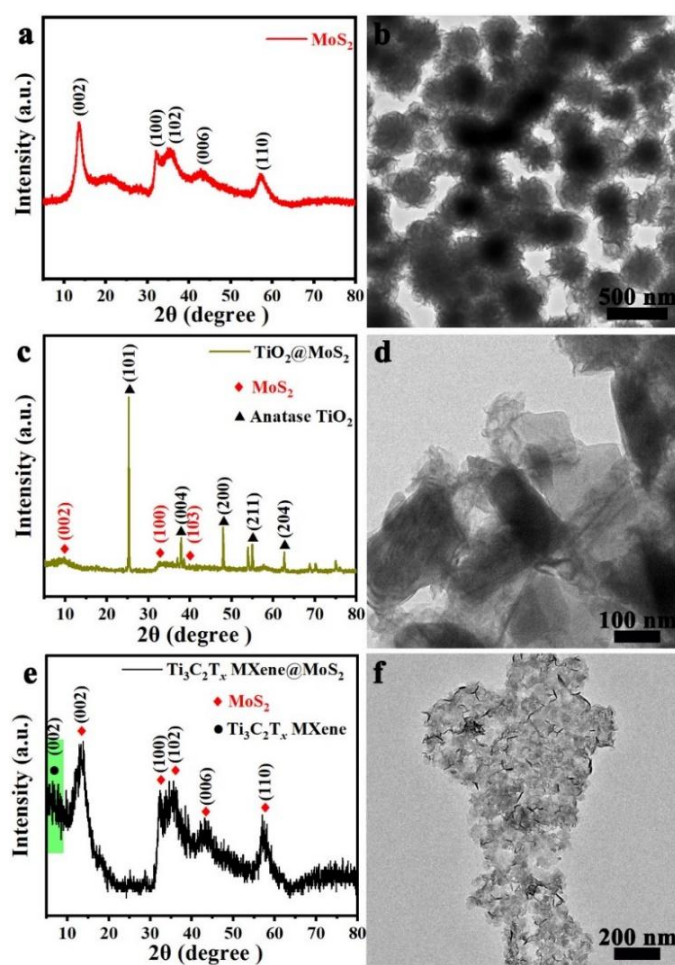

**Fig. S4** (a, c and e) XRD patterns and (b, d and f) TEM images of the pristine  $\text{MoS}_2$ ,  $\text{TiO}_2@\text{MoS}_2$  and  $\text{Ti}_3\text{C}_2\text{T}_x@\text{MoS}_2$  composites.

Generally, MoS<sub>2</sub> mainly exists in two different polymorphs, including trigonal prismatic semiconducting phase MoS<sub>2</sub> (2H-MoS<sub>2</sub>) and octahedral metallic phase MoS<sub>2</sub> (1T-MoS<sub>2</sub>). In this paper, all the synthesized MoS<sub>2</sub> are well matched to 2H-MoS<sub>2</sub>, and 2H-MoS<sub>2</sub> is simply referred to as MoS<sub>2</sub>.<sup>17,18</sup>

For the pristine MoS<sub>2</sub> sample, the major XRD peaks at 13.69, 32.10, 35.66, 43.52 and 57.47° correspond to the (002), (100), (102), (006) and (110) plane of 2H-MoS<sub>2</sub>, respectively. It shows the spherical structure assembled by MoS<sub>2</sub> layers, which is consistent with previous reports.<sup>20</sup> In the case of TiO<sub>2</sub>@MoS<sub>2</sub>, the XRD peaks at 25.3, 37.8, 47.9, 55.0 and 62.6° are in good agreement with anatase-TiO<sub>2</sub>. It is noticed that the peak for TiO<sub>2</sub> (101) crystal plane is sharp and high in intensity, showing a good crystallinity. Fig. S4e displays the composition of Ti<sub>3</sub>C<sub>2</sub>T<sub>x</sub>@MoS<sub>2</sub>, in which the characteristic peak at 6.44° corresponds to the (002) crystal plane of Ti<sub>3</sub>C<sub>2</sub>T<sub>x</sub> MXene. Besides, it displays the similar appearance as Ti<sub>3</sub>C<sub>2</sub>T<sub>x</sub>@TiO<sub>2</sub>@MoS<sub>2</sub> but with the absence of TiO<sub>2</sub>.

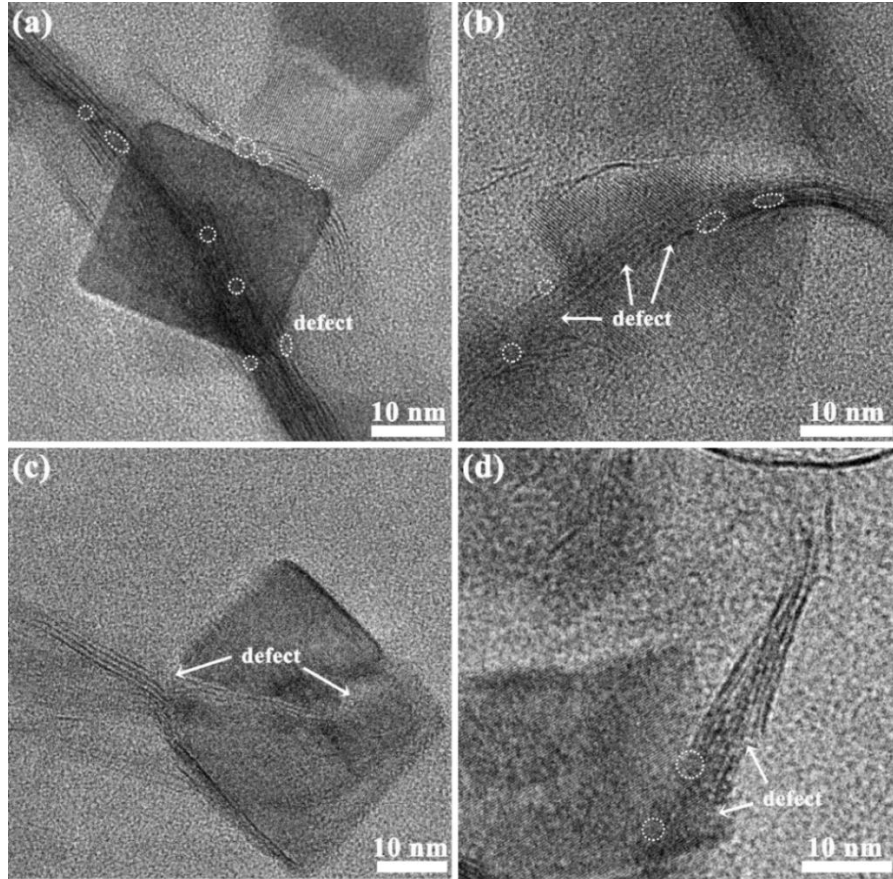

**Fig. S5** (a, b) HRTEM images of  $\text{Ti}_3\text{C}_2\text{T}_x@\text{TiO}_2@\text{MoS}_2$  composite (The defects were marked in white).

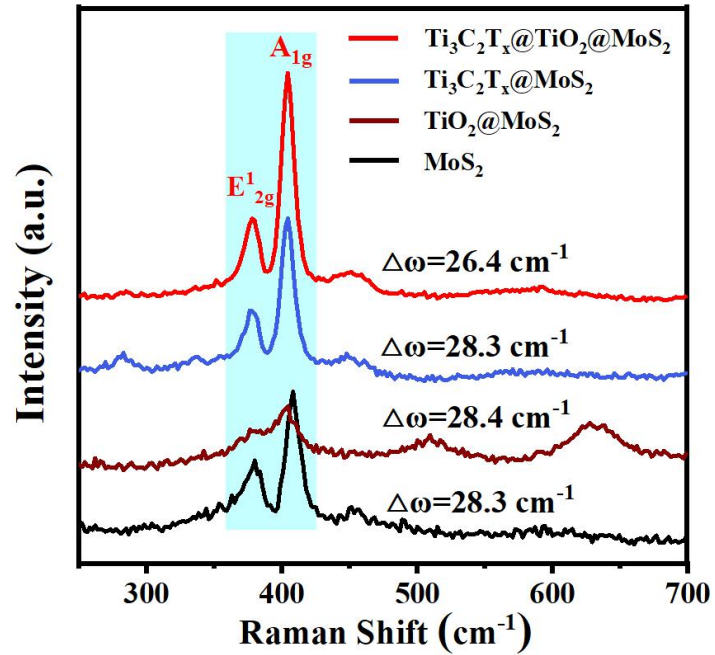

**Fig. S6** Raman spectra of the  $\text{Ti}_3\text{C}_2\text{T}_x@\text{TiO}_2@\text{MoS}_2$ ,  $\text{Ti}_3\text{C}_2\text{T}_x@\text{MoS}_2$ ,  $\text{TiO}_2@\text{MoS}_2$  composites and the pristine  $\text{MoS}_2$ .



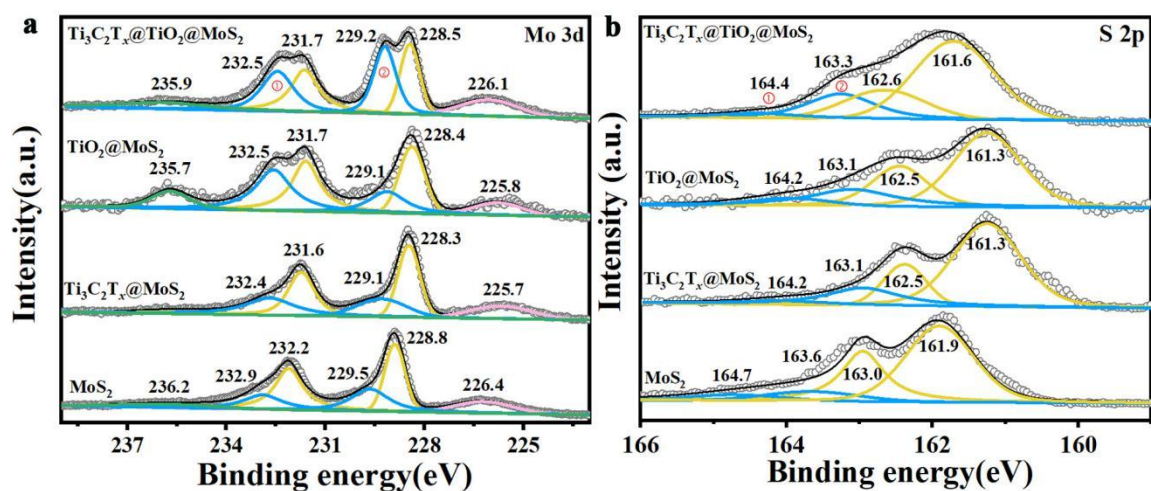

**Fig. S7** XPS spectra of Mo 3d and S 2p for different samples.

**Table S2** The bonding energy and peak area percent in  $\text{Mo}^{5+}$  and  $\text{S}_2^{2-}$  XPS spectra.

| Sample                                                      | $\text{Mo}^{5+}$ (eV) |                   | $\text{Mo}^{5+}$ ar. <sup>a</sup> (%) | $\text{S}_2^{2-}$ (eV) |                   | $\text{S}_2^{2-}$ ar. (%) |
|-------------------------------------------------------------|-----------------------|-------------------|---------------------------------------|------------------------|-------------------|---------------------------|
|                                                             | 3d <sub>3/2</sub>     | 3d <sub>5/2</sub> |                                       | 2p <sub>1/2</sub>      | 2p <sub>3/2</sub> |                           |
| $\text{Ti}_3\text{C}_2\text{T}_x@\text{TiO}_2@\text{MoS}_2$ | 232.5                 | 229.2             | 41.1                                  | 164.4                  | 163.3             | 24.1                      |
| $\text{TiO}_2@\text{MoS}_2$                                 | 232.5                 | 229.1             | 38.9                                  | 164.2                  | 163.1             | 23.5                      |
| $\text{Ti}_3\text{C}_2\text{T}_x@\text{MoS}_2$              | 232.4                 | 229.1             | 34.4                                  | 164.2                  | 163.1             | 22.4                      |
| $\text{MoS}_2$                                              | 232.9                 | 229.5             | 29.8                                  | 164.7                  | 163.6             | 15.2                      |

<sup>a</sup> ar.% is the area percent of XPS peak. ar.% = [(area①+area②)/peak area of Mo (or S) element] ×100%

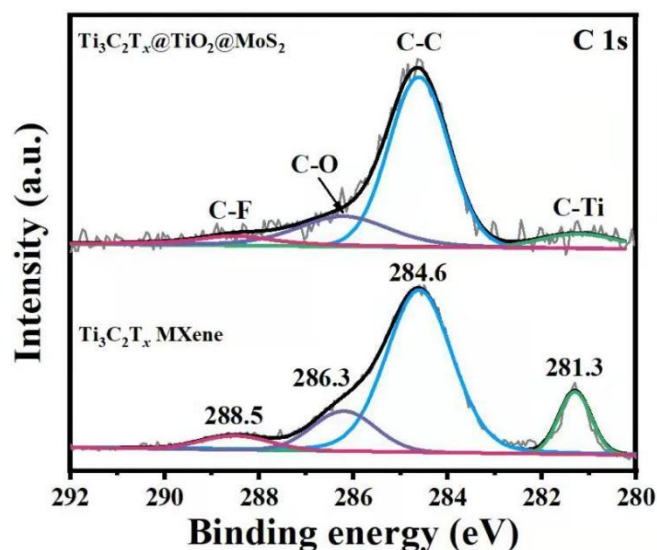

**Fig. S8** The core level XPS spectrum of C 1s in  $\text{Ti}_3\text{C}_2\text{T}_x@/\text{TiO}_2@/\text{MoS}_2$  and pristine  $\text{Ti}_3\text{C}_2\text{T}_x$  MXene.

As shown in Fig. S8, the C 1s spectra is fitted by four components located at 281.3, 284.6, 286.3, and 288.5 eV, corresponding to C-Ti, C-C, C-O, and C-F bonds, respectively. It is obvious that the C-Ti decreased significantly due to the partial oxidation of  $\text{Ti}_3\text{C}_2\text{T}_x$  to  $\text{TiO}_2$ .

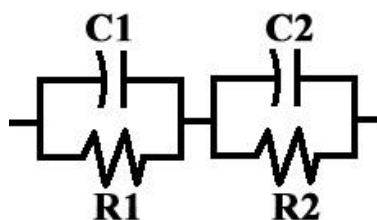

**Fig S9** The equivalent circuit model used to interpret the EIS data.

**Table S3** Parameters obtained by fitting experimental curve to equivalent circuit.

| Raw materials                                                 | $R1$ ( $\Omega$ )   | $C1$ (F)                | $R2$ ( $\Omega$ )   | $C2$ (F)                |
|---------------------------------------------------------------|---------------------|-------------------------|---------------------|-------------------------|
| $\text{Ti}_3\text{C}_2\text{T}_x@/\text{TiO}_2@/\text{MoS}_2$ | $4.173 \times 10^5$ | $3.566 \times 10^{-10}$ | $5.712 \times 10^4$ | $5.952 \times 10^{-11}$ |
| $\text{TiO}_2@/\text{MoS}_2$                                  | $7.685 \times 10^6$ | $2.090 \times 10^{-10}$ | $2.172 \times 10^5$ | $2.368 \times 10^{-10}$ |
| $\text{Ti}_3\text{C}_2\text{T}_x@/\text{MoS}_2$               | $2.607 \times 10^5$ | $1.008 \times 10^{-11}$ | $5.935 \times 10^5$ | $3.957 \times 10^{-10}$ |
| $\text{MoS}_2$                                                | $1.604 \times 10^5$ | $1.280 \times 10^{-11}$ | $1.493 \times 10^6$ | $7.902 \times 10^{-10}$ |



**Table S4.** The experimental conditions in detailed.

| Feeding weight (g)                                          | Molar ratio | Hydrothermal     | Hydrothermal             |
|-------------------------------------------------------------|-------------|------------------|--------------------------|
|                                                             | Mo:S        | temperature (°C) | time (h)                 |
|                                                             |             | 200              | 12                       |
|                                                             |             | <b>200</b>       | <b>24 (optimization)</b> |
| Na <sub>2</sub> MoO <sub>4</sub> •2H <sub>2</sub> O : 1.45  | 1:4.2       | 200              | 30                       |
| CN <sub>2</sub> H <sub>4</sub> S : 1.90                     |             | 180              | 12                       |
|                                                             |             | 180              | 24                       |
|                                                             |             | 180              | 30                       |
| Na <sub>2</sub> MoO <sub>4</sub> •2H <sub>2</sub> O : 0.725 | 1:2.1       | 200              | 24                       |
| CN <sub>2</sub> H <sub>4</sub> S : 1.90                     |             |                  |                          |
| Na <sub>2</sub> MoO <sub>4</sub> •2H <sub>2</sub> O : 1.45  | 1:8.3       | 200              | 24                       |
| CN <sub>2</sub> H <sub>4</sub> S : 0.95                     |             |                  |                          |

**Table S5** The response, response time and recovery time of different samples at RT for different NO<sub>2</sub> concentrations (RH: 23.4%).

| Sample                | Mo:S=1:4.2 |                     |                     | Mo:S=1:2.1 |                     |                     | Mo:S=1:8.3 |                     |                     |      |
|-----------------------|------------|---------------------|---------------------|------------|---------------------|---------------------|------------|---------------------|---------------------|------------|---------------------|---------------------|------------|---------------------|---------------------|------------|---------------------|---------------------|------------|---------------------|---------------------|------|
|                       | 200°C 12h  |                     |                     | 200°C 30h  |                     |                     | 180°C 12h  |                     |                     | 180°C 24h  |                     |                     | 180°C 30h  |                     |                     | 200°C 24h  |                     |                     | 200°C 24h  |                     |                     |      |
| NO <sub>2</sub> (ppm) | S          | T <sub>res</sub> /s | T <sub>rec</sub> /s | S          | T <sub>res</sub> /s | T <sub>rec</sub> /s | S          | T <sub>res</sub> /s | T <sub>rec</sub> /s | S          | T <sub>res</sub> /s | T <sub>rec</sub> /s | S          | T <sub>res</sub> /s | T <sub>rec</sub> /s | S          | T <sub>res</sub> /s | T <sub>rec</sub> /s | S          | T <sub>res</sub> /s | T <sub>rec</sub> /s |      |
| <b>50</b>             | 14.24      | 8.0                 | 38.4                | 13.15      | 3.7                 | 62.9                | 20.87      | 6.4                 | 61.3                | 35.28      | 9.1                 | 62.4                | 18.17      | 8.0                 | 100.3               | 45.97      | 2.1                 | 74.1                | 42.14      | 3.7                 | 95.5                |      |
| <b>30</b>             | 10.94      | 7.5                 | 43.2                | 10.08      | 4.8                 | 53.3                | 11.45      | 3.2                 | 48.5                | 17.92      | 10.1                | 60.3                | 9.44       | 8.5                 | 83.2                | 24.12      | 3.7                 | 59.2                | 34.63      | 2.1                 | 74.7                |      |
| <b>10</b>             | 4.75       | 8.5                 | 35.7                | 7.45       | 4.3                 | 50.7                | 5.40       | 5.3                 | 46.9                | 4.29       | 9.6                 | 52.8                | 8.04       | 9.6                 | 85.3                | 2.67       | 4.3                 | 64.5                | 3.22       | 4.3                 | 66.7                |      |
| <b>5</b>              | 3.68       | 6.4                 | 44.8                | 4.19       | 5.9                 | 47.5                | 1.63       | 6.4                 | 42.2                | 3.43       | 10.1                | 51.2                | 4.83       | 5.9                 | 69.3                | 2.24       | 6.9                 | 48.0                | 2.19       | 8.0                 | 62.4                |      |
| <b>3</b>              | 3.21       | 5.3                 | 45.9                | 3.30       | 6.9                 | 46.4                | 1.38       | 7.5                 | 39.5                | 3.22       | 8.5                 | 51.7                | 4.46       | 9.1                 | 67.2                | 1.99       | 7.5                 | 56.5                | 1.93       | 9.6                 | 54.9                |      |
| <b>1</b>              | 2.56       | 5.9                 | 42.7                | 3.06       | 8.0                 | 54.9                | 1.30       | 8.5                 | 41.1                | 2.72       | 10.1                | 55.5                | 2.07       | 7.5                 | 55.4                | 1.63       | 10.7                | 36.8                | 1.73       | 11.2                | 53.3                |      |
| <b>0.5</b>            | 1.93       | 6.9                 | 37.9                | 2.28       | 9.6                 | 56.0                | 1.21       | 7.4                 | 30.9                | 2.48       | 10.7                | 51.8                | 1.41       | 11.2                | 38.9                | 1.58       | 9.6                 | 47.5                | 1.51       | 13.9                | 58.7                |      |
| <b>0.3</b>            | 1.71       | 9.1                 | 36.3                | 1.65       | 10.7                | 42.1                | 1.15       | 6.9                 | 29.9                | 1.39       | 12.8                | 39.5                | 1.20       | 11.7                | 32.5                | 1.35       | 10.1                | 46.9                | 1.33       | 16.5                | 48.0                |      |
| <b>0.1</b>            | 1.57       | 10.7                | 34.7                | 1.23       | 11.2                | 41.6                | 1.08       | 9.6                 | 17.1                | 1.28       | 11.2                | 35.2                | 1.15       | 12.3                | 31.5                | 1.14       | 12.8                | 29.3                | 1.29       | 18.7                | 55.5                |      |
| <b>0.05</b>           | 1.22       | 9.0                 | 30.4                | 1.09       | 12.8                | 20.3                | --         | --                  | --                  | 1.18       | 14.9                | 29.3                | --         | --                  | --                  | --         | --                  | --                  | --         | 1.16                | 20.2                | 43.7 |
| <b>0.03</b>           | 1.00       | 11.7                | 22.9                | --         | --                  | --                  | --         | --                  | --                  | --         | --                  | --                  | --         | --                  | --                  | --         | --                  | --                  | --         | 1.10                | 20.8                | 42.1 |

\*S: Response T<sub>res</sub>: Response time T<sub>rec</sub>: Recovery time

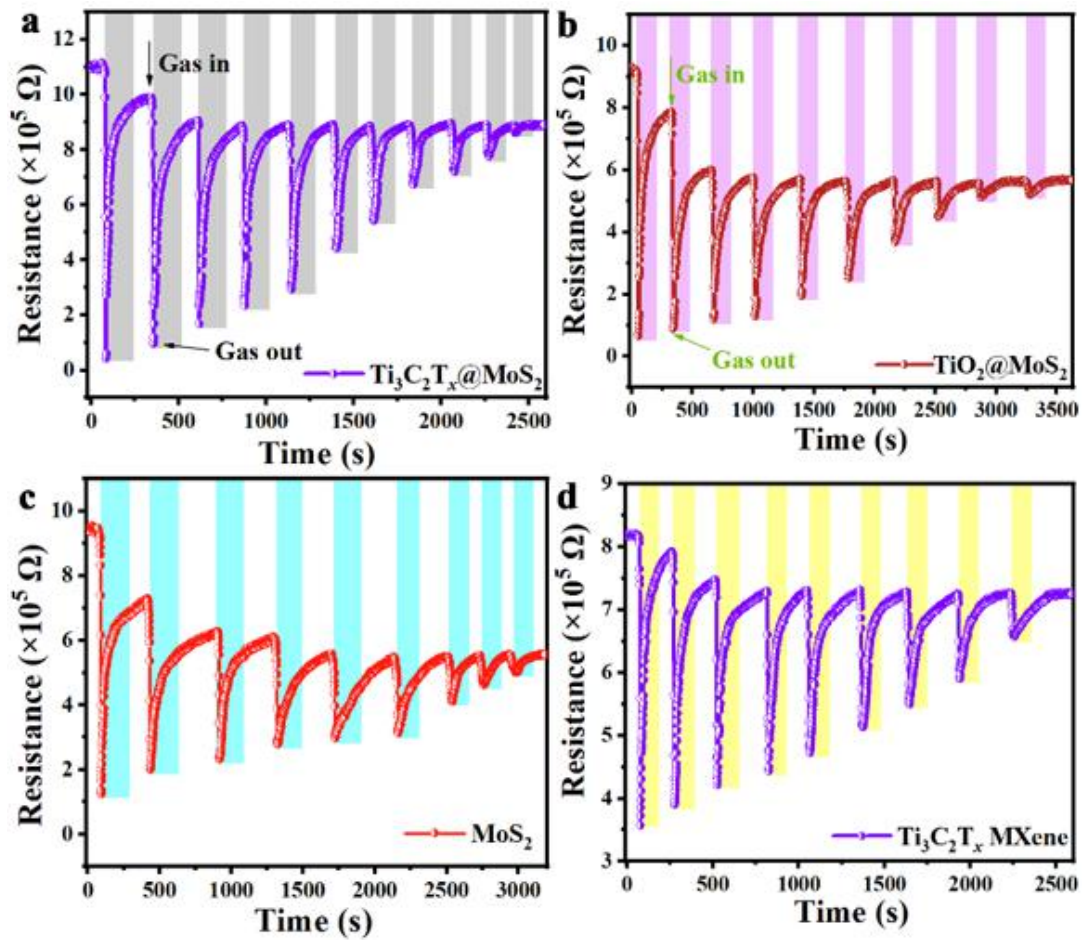

**Fig. S10** Dynamic response curves of (a)  $\text{Ti}_3\text{C}_2\text{T}_x@\text{MoS}_2$ , (b)  $\text{TiO}_2@\text{MoS}_2$ , (c)  $\text{MoS}_2$  and (d)  $\text{Ti}_3\text{C}_2\text{T}_x$  MXene sensors to different concentration of  $\text{NO}_2$  at room temperature (RH 23.4%).

**Table S6** The response, response time and recovery time of samples at RT for different NO<sub>2</sub> concentrations (RH: 23.4%).

| Sample       | Ti <sub>3</sub> C <sub>2</sub> T <sub>x</sub> @TiO <sub>2</sub> @MoS <sub>2</sub> |     |                     | TiO <sub>2</sub> @MoS <sub>2</sub> |      |                     | Ti <sub>3</sub> C <sub>2</sub> T <sub>x</sub> @MoS <sub>2</sub> |      |                     | MoS <sub>2</sub>    |      |                     |
|--------------|-----------------------------------------------------------------------------------|-----|---------------------|------------------------------------|------|---------------------|-----------------------------------------------------------------|------|---------------------|---------------------|------|---------------------|
|              | NO <sub>2</sub> (ppm)                                                             | S   | T <sub>res</sub> /s | T <sub>rec</sub> /s                | S    | T <sub>res</sub> /s | T <sub>rec</sub> /s                                             | S    | T <sub>res</sub> /s | T <sub>rec</sub> /s | S    | T <sub>res</sub> /s |
| <b>50</b>    | 55.16                                                                             | 1.8 | 70.0                | 14.46                              | 5.5  | 89.6                | 25.67                                                           | 2.1  | 71.2                | 7.59                | 8.5  | 104.8               |
| <b>30</b>    | 22.39                                                                             | 2.1 | 62.2                | 8.97                               | 6.0  | 87.8                | 10.15                                                           | 2.9  | 65.7                | 3.62                | 9.6  | 98.3                |
| <b>10</b>    | 14.34                                                                             | 3.2 | 52.5                | 8.41                               | 6.5  | 86.2                | 5.38                                                            | 3.2  | 59.0                | 2.64                | 10.1 | 93.9                |
| <b>5</b>     | 8.10                                                                              | 3.6 | 49.3                | 5.94                               | 6.8  | 84.0                | 4.91                                                            | 3.9  | 53.6                | 2.20                | 12.3 | 141.9               |
| <b>3</b>     | 4.46                                                                              | 3.9 | 41.8                | 2.74                               | 7.9  | 77.6                | 3.04                                                            | 4.6  | 51.5                | 1.88                | 12.8 | 139.7               |
| <b>1</b>     | 2.48                                                                              | 5.4 | 40.0                | 2.27                               | 9.0  | 76.7                | 2.02                                                            | 6.8  | 42.2                | 1.76                | 14.9 | 126.9               |
| <b>0.5</b>   | 1.63                                                                              | 6.1 | 36.8                | 1.54                               | 9.8  | 79.3                | 1.63                                                            | 7.5  | 37.9                | 1.35                | 13.3 | 90.7                |
| <b>0.3</b>   | 1.44                                                                              | 6.4 | 34.7                | 1.26                               | 10.7 | 72.0                | 1.33                                                            | 8.2  | 36.4                | 1.21                | 15.5 | 66.7                |
| <b>0.1</b>   | 1.27                                                                              | 7.2 | 32.5                | 1.09                               | 11.1 | 66.1                | 1.24                                                            | 8.6  | 34.7                | 1.11                | 17.6 | 63.5                |
| <b>0.05</b>  | 1.23                                                                              | 7.5 | 30.7                | 1.00                               | 11.3 | 49.3                | 1.14                                                            | 9.3  | 32.5                | --                  | --   | --                  |
| <b>0.03</b>  | 1.17                                                                              | 7.9 | 28.9                | --                                 | --   | --                  | 1.03                                                            | 10.4 | 29.3                | --                  | --   | --                  |
| <b>0.023</b> | 1.08                                                                              | 8.6 | 26.8                | --                                 | --   | --                  | --                                                              | --   | --                  | --                  | --   | --                  |

**\*S: Response    T<sub>res</sub>: Response time    T<sub>rec</sub>: Recovery time**

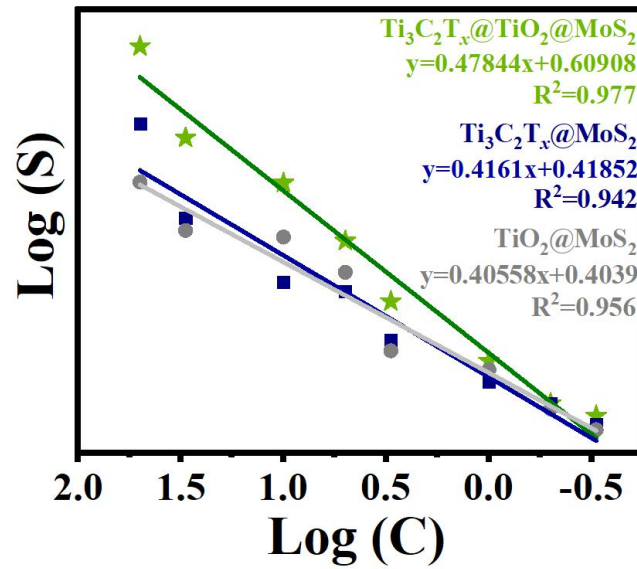

**Fig. S11** The linear fitting of the  $\text{Ti}_3\text{C}_2\text{T}_x@\text{TiO}_2@\text{MoS}_2$ ,  $\text{Ti}_3\text{C}_2\text{T}_x @\text{MoS}_2$  and  $\text{TiO}_2@\text{MoS}_2$  sensors obtained from Fig.5a and S10a and b.

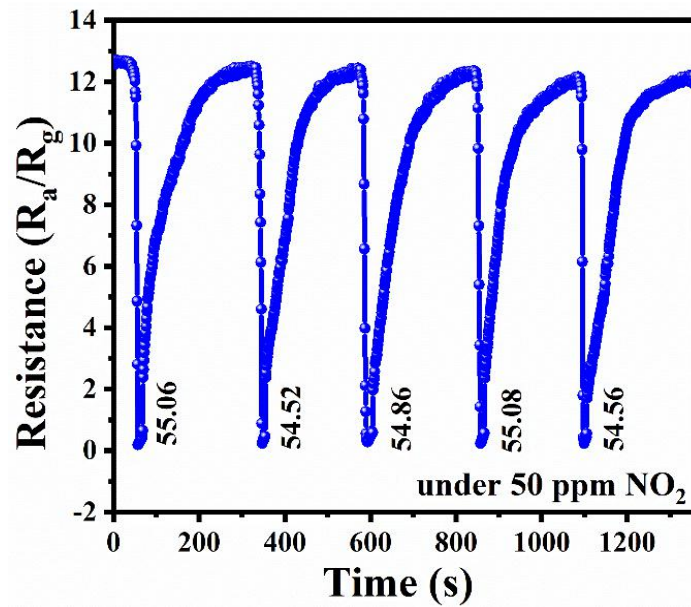

**Fig. S12** Repeatability of the  $\text{Ti}_3\text{C}_2\text{T}_x@\text{TiO}_2@\text{MoS}_2$  sensor to 50 ppm  $\text{NO}_2$  with 5 circles.

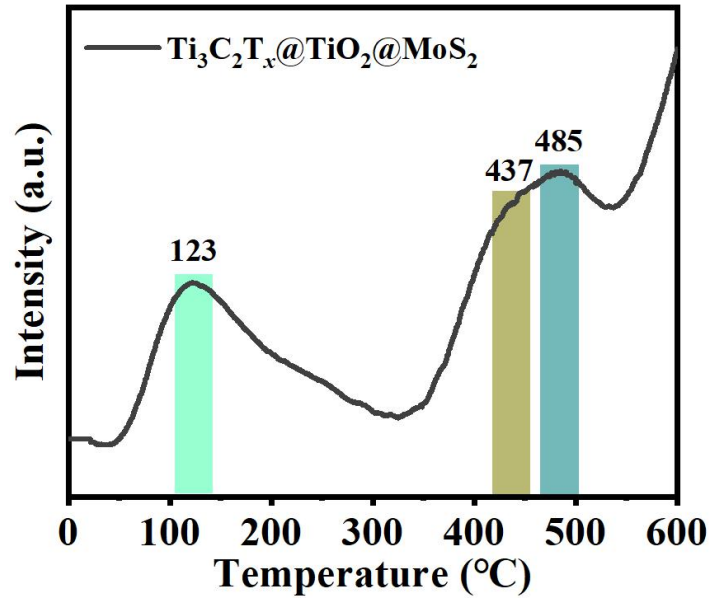

Fig. S13  $\text{NO}_2$ -TPD of  $\text{Ti}_3\text{C}_2\text{T}_x@TiO_2@MoS_2$  composite.

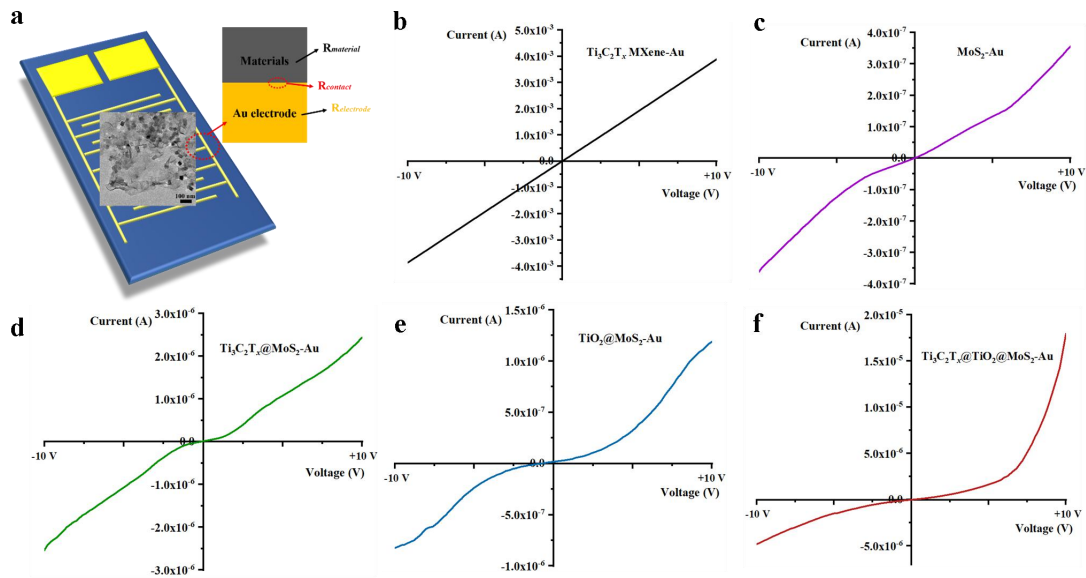

Fig. S14 The study of contact resistance: (a) gold interdigitated electrode for equivalent resistance models, and  $I$ - $V$  curves of (b)  $\text{Ti}_3\text{C}_2\text{T}_x$  MXene-Au, (c)  $\text{MoS}_2$ -Au, (d)  $\text{Ti}_3\text{C}_2\text{T}_x@MoS_2$ -Au, (e)  $\text{TiO}_2@MoS_2$ -Au, (f)  $\text{Ti}_3\text{C}_2\text{T}_x@TiO_2@MoS_2$ -Au.



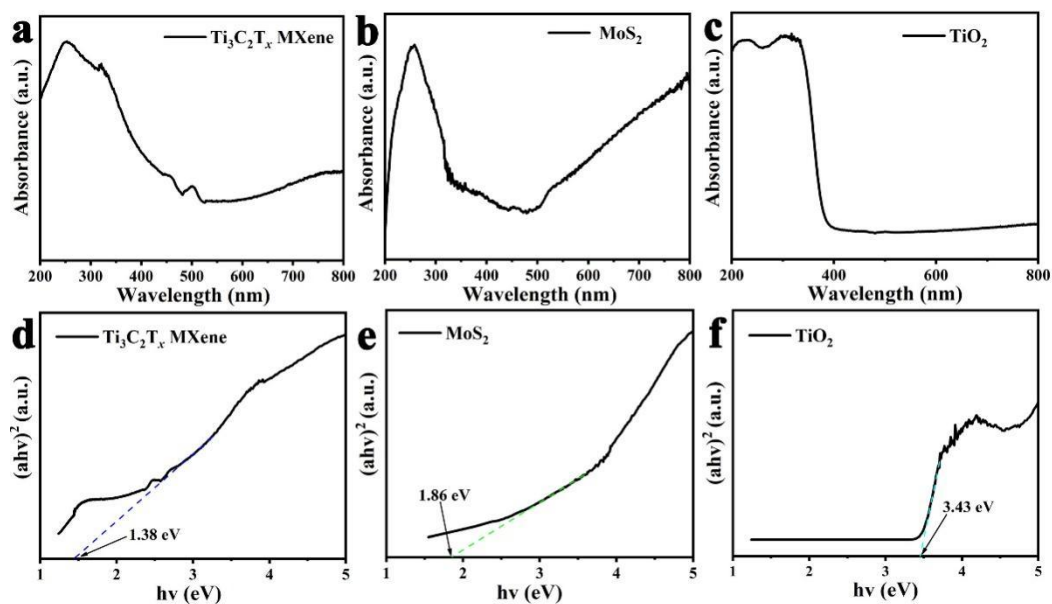

**Fig. S15** (a)-(c) UV-Vis absorption spectra and (d)-(f) Tauc plots of  $\text{Ti}_3\text{C}_2\text{T}_x$  MXene,  $\text{MoS}_2$  and  $\text{TiO}_2$ . (The energy value at the point of intersection at the tangent line and the horizontal axis is the optical band gap).

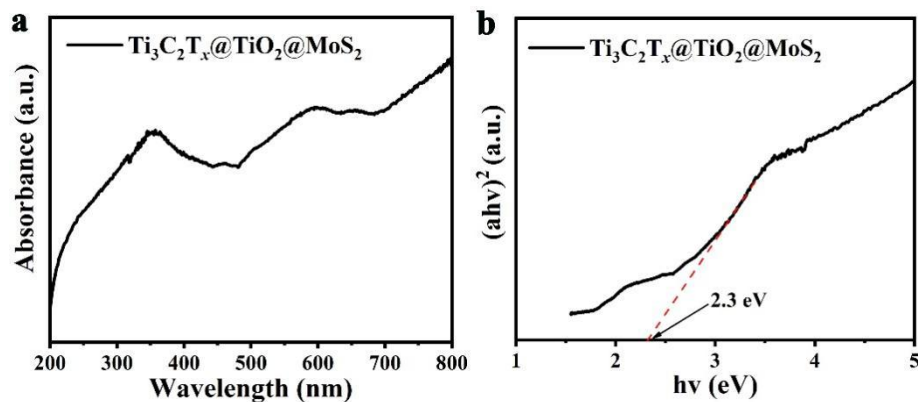

**Fig. S16** (a) UV-Vis absorption spectra and (b) Tauc plots of  $\text{Ti}_3\text{C}_2\text{T}_x@ \text{TiO}_2@ \text{MoS}_2$  composites.

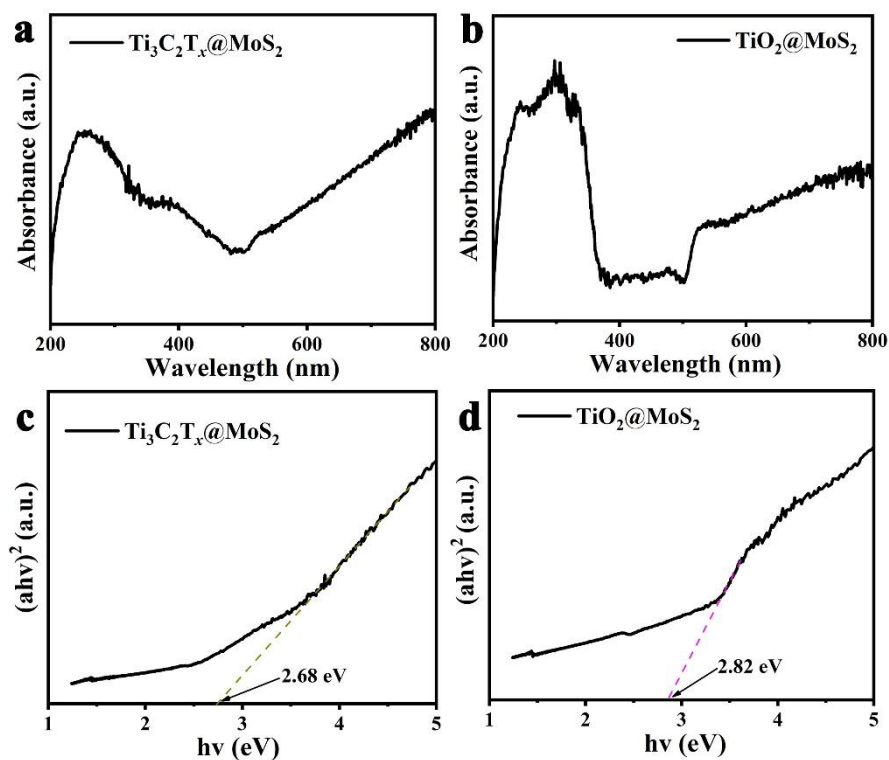

**Fig. S17** (a and b) UV-Vis absorption spectra and (c and d) Tauc plots of  $\text{Ti}_3\text{C}_2\text{T}_x@\text{MoS}_2$  and  $\text{TiO}_2@\text{MoS}_2$  composites.

UV-vis analysis was conducted to further evaluate the band gaps of  $\text{Ti}_3\text{C}_2\text{T}_x$  MXene,  $\text{MoS}_2$ ,  $\text{TiO}_2$ ,  $\text{Ti}_3\text{C}_2\text{T}_x@\text{TiO}_2@\text{MoS}_2$ ,  $\text{Ti}_3\text{C}_2\text{T}_x@\text{MoS}_2$  and  $\text{TiO}_2@\text{MoS}_2$  composites are 1.38, 1.86, 3.43, 2.3, 2.68 and 2.82 eV respectively, which were calculated by the Kubelka-Munk method (Figure S12-17).

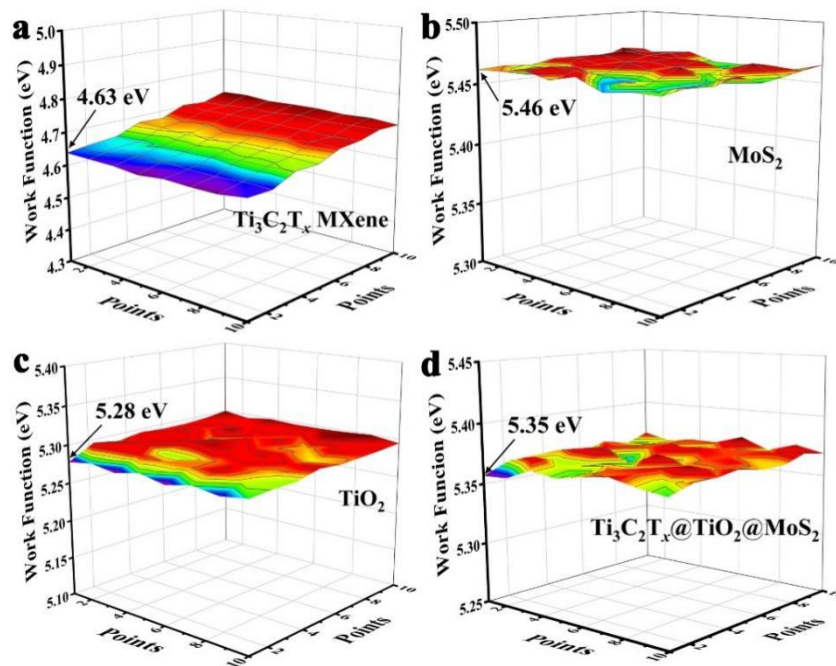

**Fig. S18** (a)-(d) Scheme of the Kelvin probes of the  $\text{Ti}_3\text{C}_2\text{T}_x$  MXene,  $\text{MoS}_2$ ,  $\text{TiO}_2$  and the  $\text{Ti}_3\text{C}_2\text{T}_x@/\text{TiO}_2@/\text{MoS}_2$  hybrid composite.

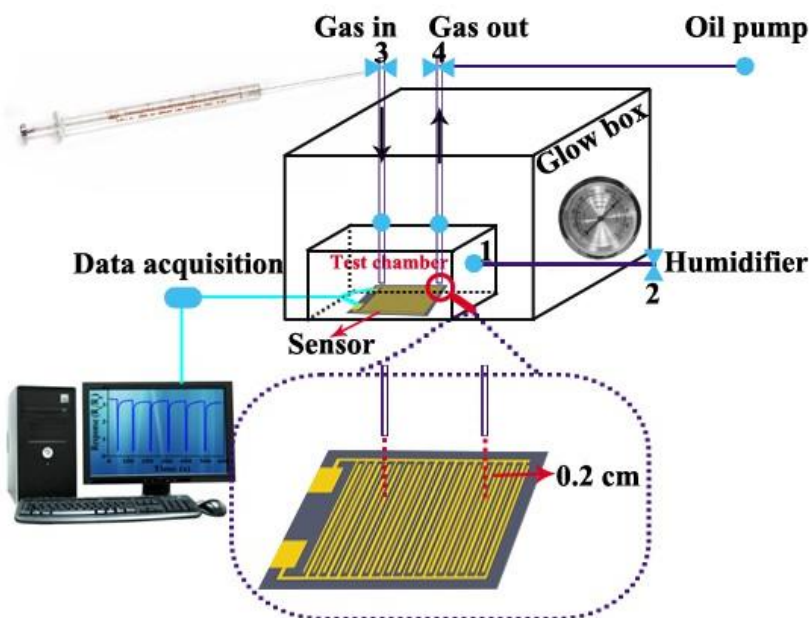

**Fig. S19** The gas delivery system diagram for the sensing process.

## References:

1. A.V. Agrawal, R. Kumar, S. Venkatesan, A. Zakhidov, G. Yang, J. Bao, Photoactivated mixed in-plane and edge-enriched p-type MoS<sub>2</sub> flake-based NO<sub>2</sub> sensor working at room temperature. *ACS Sensors*. 5 (2018) 998-1004.
2. H. Tabata, H. Matsuyama, T. Goto, O. Kubo and M. Katayama, *ACS nano*, 2021, 15, 2542-2553.6
3. W. Zheng, Y. Xu, L. Zheng, C. Yang, N. Pinna, X. Liu, J. Zhang, MoS<sub>2</sub> Van der Waals p-n Junctions Enabling Highly Selective Room-Temperature NO<sub>2</sub> Sensor, *Advanced Functional Materials*, 30 (2020) 2000435.
4. H. Long, A. Harley-Trochimczyk, T. Pham, Z. Tang, T. Shi, A. Zettl, C. Carraro, M. A. Worsley and R. Maboudian, *Advanced Functional Materials*, 2016, 26, 5158-5165.
5. M. Hojamberdiev, N. Goel, R. Kumar, Z.C. Kadirova, M. Kumar, Efficient NO<sub>2</sub> sensing performance of a low-cost nanostructured sensor derived from molybdenite concentrate, *Green Chemistry*, 22 (2020) 6981-6991.
6. M. Ikram, H. Lv, Z. Liu, K. Shi and Y. Gao, *Journal of Materials Chemistry A*, 2021.
7. M. Ikram, H. Lv, Z. Liu, M. Khan, L. Liu, F. Raziq, X. Bai, M. Ullah, Y. Zhang and K. Shi, *Chemistry of Materials*, 2020, 32, 7215-7225.
8. Y. Zhou, C. Gao, Y. Guo, UV assisted ultrasensitive trace NO<sub>2</sub> gas sensing based on few-layer MoS<sub>2</sub> nanosheet-ZnO nanowire heterojunctions at room temperature, *Journal of Materials Chemistry A*, 6 (2018) 10286-10296.
9. Y. Ding, X. Guo, D. Kuang, X. Hu, Y. Zhou, Y. He and Z. Zang, *Journal of Hazardous Materials*, 2021, 126218.
10. B. Zong, Q. Li, X. Chen, C. Liu, L. Li, J. Ruan, S. Mao, Highly Enhanced Gas Sensing Performance Using a 1T/2H Heterophase MoS<sub>2</sub> Field-Effect Transistor at Room Temperature, *ACS Appl Mater Interfaces*, 12 (2020) 50610-50618.
11. Y. Li, Z. Song, Y. Li, S. Chen, S. Li, Y. Li, Hierarchical hollow MoS<sub>2</sub> microspheres as materials for conductometric NO<sub>2</sub> gas sensors. *Sensors and Actuators B: Chemical*. 282 (2019) 259-67.
12. Z. Yang, D. Zhang and H. Chen, *Sensors and Actuators B: Chemical*, 2019, 300, 127037.

13. J. Liu, Z. Hu, Y. Zhang, H.-Y. Li, N. Gao, Z. Tian, L. Zhou, B. Zhang, J. Tang and J. Zhang, *Nano-micro letters*, 2020, 12, 1-13.
14. J. Xia, S.-Z. Yang, B. Wang, P. Wu, I. Popovs, H. Li, S. Irle, S. Dai and H. Zhu, *Nano Energy*, 2020, 72, 104681.
15. Y. Guo, T. Wang, Q. Yang, X. Li, H. Li, Y. Wang, T. Jiao, Z. Huang, B. Dong and W. Zhang, *ACS nano*, 2020, 14, 9089-9097.
16. P. Ilanchezhian, G. M. Kumar and T. Kang, *Journal of Alloys and Compounds*, 2015, 634, 104-108.
17. B. Dai, B. Zhao, X. Xie, T. Su, B. Fan, R. Zhang and R. Yang, *Journal of Materials Chemistry C*, 2018, 6, 5690-5697.
18. Y. Li, S. Yang, Z. Liang, Y. Xue, H. Cui and J. Tian, *Materials Chemistry Frontiers*, 2019, 3, 2673-2680.
19. D. Wang, B. Su, Y. Jiang, L. Li, B. K. Ng, Z. Wu and F. Liu, *Chemical Engineering Journal*, 2017, 330, 102-108.
20. R. Tang, D. Gong, Y. Deng, S. Xiong, J. Deng, L. Li, Z. Zhou, J. Zheng, L. Su and L. Yang, *Chemical Engineering Journal*, 2022, 427, 131809.
